# Supplementary material for: Recruitment of the mitotic exit network to yeast centrosomes couples septin displacement to actomyosin constriction
Source: PubMed Central journal article supplement (PMC6193047; doi:10.1038/s41467-018-06767-0), 2018-10-17
Supplement: 41467_2018_6767_MOESM2_ESM.pdf [file 41467_2018_6767_MOESM2_ESM.pdf]

## Description of Additional Supplementary Files

**File Name:** Supplementary Movie 1

**Description:** Constitutive recruitment of Cdc14 to SPBs suppresses the cytokinetic defects of GAL1-DMA2 cells. GAL1-DMA2 BUD4 cells expressing Nud1-GBD at endogenous levels and Cdc14-GFP from a centromeric plasmid were imaged at 30°C every 4 min in selective medium (-His containing raffinose and galactose) after being induced for ~90 min with galactose. Left panel: transmitted light; central panel: Shs1-mCherry; right panel: Cdc14-GFP.

**File Name:** Supplementary Data 1

**Description:** List of *S. cerevisiae* strains used in this study (plasmids are indicated in brackets)
